# Supplementary material for: Stabilization of caesium ions by simple organic molecules: crystal structures of Cs(OXL) (OXL = oxalurate anion) and the CsOH/cyanuric acid co-crystal Cs3(CYH3)4(OH)3 (CYH3 = cyanuric acid)
Source: Royal Society of Chemistry journal article supplement (doi:10.1039/d0nj05601d), 2021-01-01
Supplement: d0nj05601d1.pdf [file d0nj05601d1.pdf]

## New Journal of Chemistry

### Electronic Supporting Information (ESI)

#### Stabilization of caesium ions by simple organic molecules: crystal structures of Cs(OXL) (OXL = oxalurate anion), and CsOH/cyanuric acid co-crystal Cs<sub>3</sub>(CYH<sub>3</sub>)<sub>4</sub>(OH)<sub>3</sub> (CYH<sub>3</sub> = cyanuric acid)

Francesco Isaia,<sup>\*a</sup> Alessandra Garau,<sup>a</sup> Carlo Castellano,<sup>b</sup> Francesco Demartin,<sup>b</sup> M. Carla Aragoni,<sup>a</sup> Massimiliano Arca,<sup>a</sup> Claudia Caltagirone,<sup>a</sup> Vito Lippolis,<sup>a</sup> Tiziana Pivetta<sup>a</sup>

<sup>a</sup>Dipartimento di Scienze Chimiche e Geologiche, Università degli Studi di Cagliari, Cittadella Universitaria, Monserrato CA, 09042, Italy

<sup>b</sup>Dipartimento di Chimica, Università degli Studi di Milano, via Golgi 19, Milano, 20133, Italy.

#### CONTENTS

|                                                                                                                                                    | page |
|----------------------------------------------------------------------------------------------------------------------------------------------------|------|
| Scheme S1. Reaction of parabanic acid with the hydroxide ion: formation of the oxalurate ion                                                       | S2   |
| Table S1. Crystallographic data and structure refinement details of Cs(OXL) and Cs <sub>3</sub> (CYH <sub>3</sub> ) <sub>4</sub> (OH) <sub>3</sub> | S2   |
| Table S2. Cs(OXL) - Selected interatomic distances (Å) and angles (deg.)                                                                           | S3   |
| Table S3. Cs <sub>3</sub> (CYH <sub>3</sub> ) <sub>4</sub> (OH) <sub>3</sub> - Selected interatomic distances (Å) and angles (deg.)                | S4   |
| Figure S1. Perspective view of the Cs(OXL) showing the alignment of the ribbons made by the oxalurate anions along [010]                           | S5   |
| Figure S2. Perspective view of Cs(OXL) showing the hydrogen bonds between the layers                                                               | S5   |
| Table S4. Electrostatic potential surface of OXL anion, bent form                                                                                  | S6   |
| Table S5. Electrostatic potential surface of OXL anion, planar form                                                                                | S6   |
| Table S6. Atoms electrostatic charge of di-OXL anion                                                                                               | S7   |
| References.                                                                                                                                        | S7   |

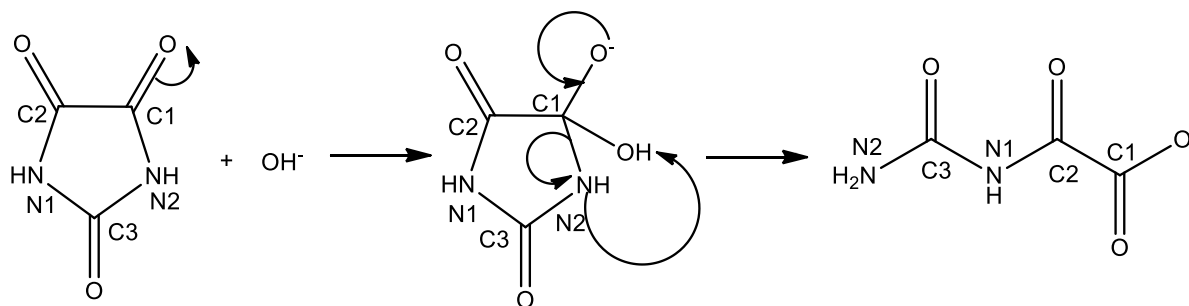

**Scheme S1.** The parabanic acid undergoes the basic hydrolysis of the imide bond, the attack of  $\text{OH}^-$  occurs either on C4 or C5 as they are more positive than C2 because they are bound together. Consequently, the break of the carbon-nitrogen bond will occur between the atoms N3-C4 or N1-C5 leading to the oxalurate anion formation.<sup>1</sup>

**Table S1.** Crystallographic data and structure refinement details

| Compound                                             | CsOXL(1)                                                      | Cs <sub>3</sub> (CYH <sub>3</sub> ) <sub>4</sub> (OH) <sub>3</sub> (2) |
|------------------------------------------------------|---------------------------------------------------------------|------------------------------------------------------------------------|
| Formula                                              | C <sub>3</sub> H <sub>3</sub> CsN <sub>2</sub> O <sub>4</sub> | C <sub>4</sub> HCsN <sub>3</sub> O <sub>5</sub>                        |
| Crystal system                                       | triclinic                                                     | triclinic                                                              |
| Space group                                          | <i>P</i> -1 (no. 2)                                           | <i>P</i> -1 (no. 2)                                                    |
| <i>M.W.</i>                                          | 263.98                                                        | 966.09                                                                 |
| <i>a</i> / Å                                         | 7.8313(4)                                                     | 10.506(1)                                                              |
| <i>b</i> / Å                                         | 8.4529(4)                                                     | 10.536(1)                                                              |
| <i>c</i> / Å                                         | 10.3855(5)                                                    | 13.657(2)                                                              |
| $\alpha$ / °                                         | 71.08(1)                                                      | 98.13(2)                                                               |
| $\beta$ / °                                          | 83.49(1)                                                      | 103.99(2)                                                              |
| $\gamma$ / °                                         | 81.22(1)                                                      | 111.54(2)                                                              |
| <i>V</i> / Å <sup>3</sup>                            | 641.22(5)                                                     | 1319.5(3)                                                              |
| <i>Z</i>                                             | 4                                                             | 2                                                                      |
| <i>D<sub>c</sub></i> / g/cm <sup>-3</sup>            | 2.734                                                         | 2.432                                                                  |
| $\mu$ / mm <sup>-1</sup>                             | 5.730                                                         | 4.215                                                                  |
| Measured reflections                                 | 8153                                                          | 13917                                                                  |
| Unique reflections, <i>R</i> <sub>int</sub>          | 3188, 0.030                                                   | 7891, 0.054                                                            |
| Observed reflections<br>[ <i>I</i> > 2σ( <i>I</i> )] | 2503                                                          | 5787                                                                   |
| Absorption correction                                | SADABS                                                        | SADABS                                                                 |
| <i>T</i> <sub>min</sub> , <i>T</i> <sub>max</sub>    | 0.554, 1.000                                                  | 0.583, 1.000                                                           |
| <i>R</i>                                             | 0.0299                                                        | 0.087                                                                  |
| <i>wR2</i> [all data]                                | 0.0750                                                        | 0.267                                                                  |
| <i>GOF</i>                                           | 0.959                                                         | 1.069                                                                  |

$R = \frac{\sum ||F_o| - |F_c||}{\sum |F_o|}$ ;  $wR2 = \left\{ \frac{\sum [w(F_o^2 - F_c^2)^2]}{\sum [w(F_o^2)^2]} \right\}^{1/2}$ ;  
 $GOF = \left\{ \frac{\sum [w(F_o^2 - F_c^2)]}{(n-p)} \right\}^{1/2}$  where *n* is the number of reflections and *p* is the number of refined parameters.

**Table S2.** Cs(OXL) (1) - Selected interatomic distances (Å) and angles (deg.)

|         |          |         |          |
|---------|----------|---------|----------|
| Cs1-O1  | 3.007(3) | Cs2-O1  | 3.232(4) |
| Cs1-O2a | 3.180(4) | Cs2-O3b | 3.112(3) |
| Cs1-O3  | 3.229(3) | Cs2-O4c | 3.601(4) |
| Cs1-O3b | 3.228(4) | Cs2-O4b | 3.221(3) |
| Cs1-O4c | 3.285(3) | Cs2-O5  | 2.975(3) |
| Cs1-O4b | 3.306(4) | Cs2-O5e | 3.334(4) |
| Cs1-O6d | 3.184(4) | Cs2-O6e | 3.433(4) |
| Cs1-O7b | 3.036(3) | Cs2-O7  | 3.183(3) |
| Cs1-O8b | 3.068(3) | Cs2-O8c | 3.150(3) |
| O1-C1   | 1.241(5) | O5-C4   | 1.234(6) |
| O2-C1   | 1.255(5) | O6-C4   | 1.258(5) |
| O3-C2   | 1.219(5) | O7-C5   | 1.218(5) |
| O4-C3   | 1.226(5) | O8-C6   | 1.223(5) |
| N1-C2   | 1.356(6) | N3-C5   | 1.369(6) |
| N1-C3   | 1.403(6) | N3-C6   | 1.420(6) |
| N2-C3   | 1.328(6) | N4-C6   | 1.327(6) |
| C1-C2   | 1.556(6) | C4-C5   | 1.567(6) |

**Hydrogen bonds**

|          |          |              |          |
|----------|----------|--------------|----------|
| N1···O2  | 2.648(5) | N1-H1···O2   | 101.1(3) |
| N3···O6  | 2.650(5) | N3-H3···O6   | 108.2(3) |
| N2···O6f | 2.902(5) | N2-H2B···O6f | 156.1(3) |
| N1···O6f | 2.972(5) | N1-H1···O6f  | 155.6(3) |
| N3···O2f | 2.895(6) | N3-H3···O2f  | 153.4(3) |
| N4···O2f | 2.875(5) | N4-H4B···O2f | 153.0(3) |
| N4-O5g   | 2.849(6) | N4-H4A···O5g | 171.7(3) |
| N2-O1g   | 2.878(6) | N2-H2A···O1g | 170.9(3) |

Symmetry codes: a = 1- x, 1-y, 1-z; b = -x, 1-y, 1-z; c = x, 1+y, z; d = x, y, z+1; e = -x, 2-y, -z; f = 1-x, 1-y, -z; g = x, y-1, z.

**TABLE S3.** Cs<sub>3</sub>(CYH<sub>3</sub>)<sub>4</sub>(OH)<sub>3</sub> (**2**) - Selected interatomic distances (Å) and angles (deg.)

|                       |           |                |           |
|-----------------------|-----------|----------------|-----------|
| Cs1-O1                | 3.095(9)  | Cs2-O1         | 3.404(11) |
| Cs1-O2e               | 3.169(10) | Cs2-O2h        | 3.114(8)  |
| Cs1-O9f               | 3.583(11) | Cs2-O3c        | 3.007(9)  |
| Cs1-O11a              | 3.271(11) | Cs2-O5h        | 3.478(12) |
| Cs1-O11g              | 3.307(13) | Cs2-O8g        | 3.651(12) |
| Cs1-O12f              | 3.166(9)  | Cs2-O10i       | 3.072(8)  |
| Cs1-OH1               | 3.295(15) | Cs2-O11g       | 3.156(10) |
| Cs1-OH2               | 3.149(13) | Cs2-OH2j       | 3.648(14) |
| Cs1-O4                | 3.823(13) | Cs2-OH3        | 3.281(12) |
| Cs3-O4                | 3.297(11) | Cs3-O9d        | 3.580(11) |
| Cs3-O5a               | 3.332(10) | Cs3-OH1        | 3.448(15) |
| Cs3-O6d               | 3.192(9)  | Cs3-OH1d       | 3.336(14) |
| Cs3-O7                | 3.209(9)  | Cs3-OH2        | 3.161(14) |
| Cs3-O8e               | 3.333(10) | Cs3-OH3e       | 3.653(17) |
| <br>                  |           |                |           |
| C1-O1                 | 1.248(13) | C4-O4          | 1.234(13) |
| C1-N1                 | 1.391(15) | C4-N4          | 1.408(15) |
| C1-N3                 | 1.340(14) | C4-N6          | 1.356(15) |
| C2-O2                 | 1.251(15) | C5-O5          | 1.219(15) |
| C2-N1                 | 1.384(14) | C5-N4          | 1.348(13) |
| C2-N2                 | 1.368(14) | C5-N5          | 1.367(14) |
| C3-O3                 | 1.250(14) | C6-O6          | 1.231(14) |
| C3-N2                 | 1.386(15) | C6-N5          | 1.415(15) |
| C3-N3                 | 1.357(13) | C6-N6          | 1.341(15) |
| C7-O7                 | 1.224(13) | C10-O10        | 1.237(13) |
| C7-N7                 | 1.369(15) | C10-N10        | 1.411(14) |
| C7-N9                 | 1.380(14) | C10-N12        | 1.365(14) |
| C8-O8                 | 1.234(16) | C11-O11        | 1.236(15) |
| C8-N7                 | 1.391(15) | C11-N10        | 1.375(13) |
| C8-N8                 | 1.369(15) | C11-N11        | 1.361(14) |
| C9-O9                 | 1.232(14) | C12-O12        | 1.251(13) |
| C9-N8                 | 1.361(15) | C12-N11        | 1.384(14) |
| C9-N9                 | 1.365(13) | C12-N12        | 1.355(13) |
| <br>                  |           |                |           |
| <b>Hydrogen bonds</b> |           |                |           |
| N4···O7a              | 2.765(14) | N4-H4···O7a    | 173(1)    |
| N1···O10a             | 2.841(13) | N1-H1···O10a   | 179(1)    |
| N7···O4a              | 2.838(14) | N7-H7···O4a    | 174(1)    |
| N10···O1a             | 2.867(14) | N10-H10···O1a  | 175(1)    |
| N5-O9b                | 2.906(15) | N5-H5···O9b    | 173(1)    |
| N8···O6b              | 2.751(15) | N8-H8···O6b    | 177(1)    |
| N2-O12b               | 2.846(15) | N2-H2···O12b   | 170(1)    |
| N11-O3b               | 2.808(15) | N11-H11···O3b  | 177(1)    |
| N3···OH3c             | 2.875(21) | N3-H3···OH3c   | 132(1)    |
| N9-OH1d               | 2.671(22) | N9-H9···OH1d   | 157(1)    |
| N12-OH3e              | 2.793(21) | N12-H12···OH3e | 161(1)    |

Symmetry codes: a = -x, -y, -z; b = 1-x, 1-y, -z; c = -x, 1-y, -1-z; d = -x, 1-y, -z; e = x,y, 1+z; e = x-1, y, z; f = -x, 1-y, -z; g = x-1, y, z-1; h = -x, -y, -1-z; i = x,y,z-1; j = -1-x,-y,-1-z;

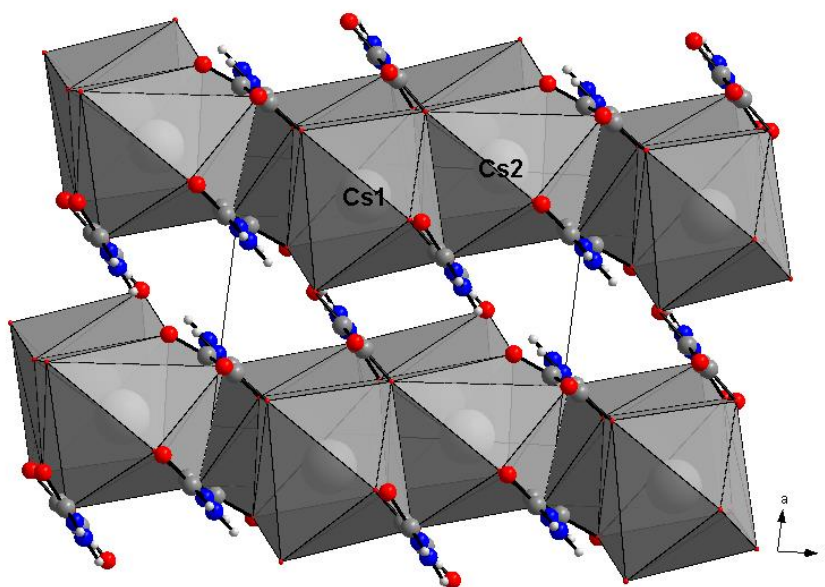

**Figure S1.** Perspective view of the Cs(OXL) (1) structure showing the alignment of the ribbons made by the oxalurate anions along [010].

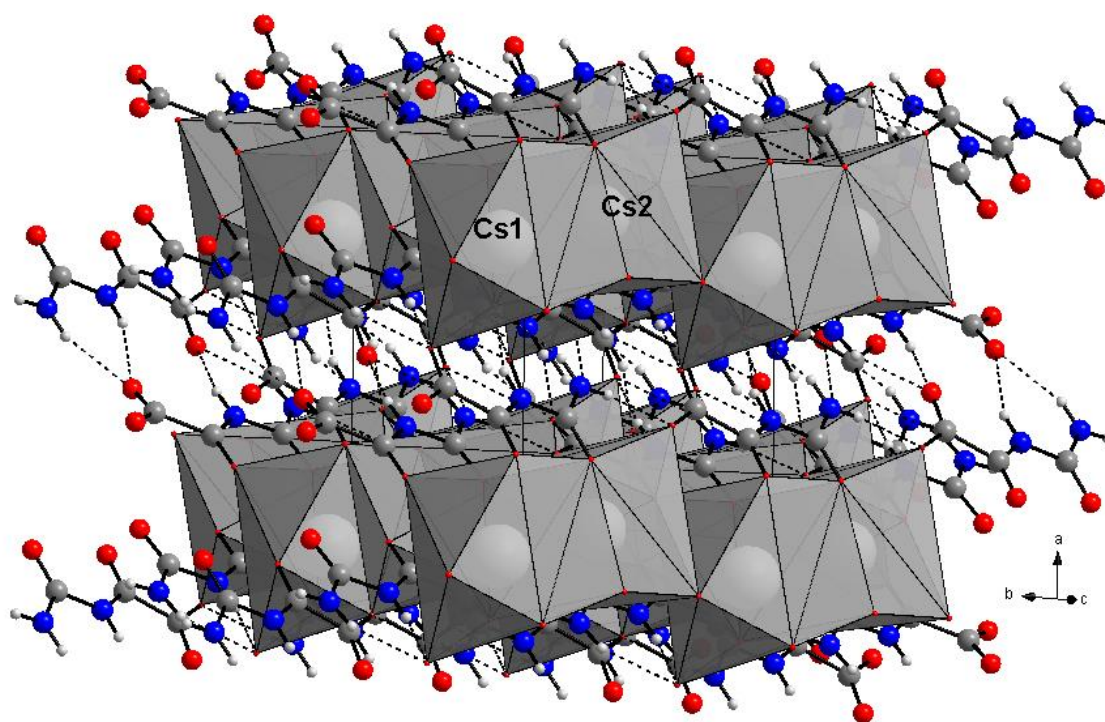

**Figure S2.** Perspective view of the Cs(OXL) (1) structure showing the hydrogen bonds between the layers.

**Table S4.** Electrostatic potential surface (left), and atoms electrostatic charge (right) of OXL anion, bent form.

|                                                                                   | Charge (e) |          |               |         |
|-----------------------------------------------------------------------------------|------------|----------|---------------|---------|
|                                                                                   | Atom       | Mulliken | Electrostatic | Natural |
| 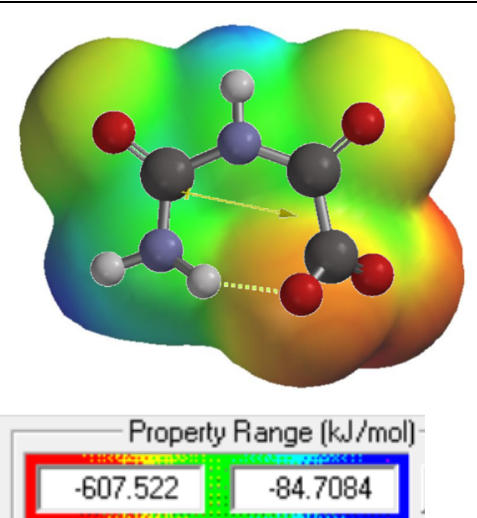 | O1         | -0.579   | -0.598        | -0.685  |
|                                                                                   | O2         | -0.639   | -0.671        | -0.799  |
|                                                                                   | O3         | -0.453   | -0.479        | -0.541  |
|                                                                                   | O4         | -0.516   | -0.587        | -0.645  |
|                                                                                   | N1         | -0.501   | -0.684        | -0.745  |
|                                                                                   | N2         | -0.615   | -0.899        | -0.916  |
|                                                                                   | C1         | 0.514    | 0.483         | 0.675   |
|                                                                                   | C2         | 0.412    | 0.543         | 0.590   |
|                                                                                   | C3         | 0.591    | 0.844         | 0.810   |
|                                                                                   | H2 (N2)    | 0.237    | 0.343         | 0.394   |
|                                                                                   | H3 (N2)    | 0.289    | 0.372         | 0.436   |
|                                                                                   | H4 (N1)    | 0.262    | 0.334         | 0.425   |

**Table S5.** Electrostatic potential surface (left), and atoms electrostatic charge (right) of OXL anion, planar form.

|                                                                                     | Charge (e) |          |               |         |
|-------------------------------------------------------------------------------------|------------|----------|---------------|---------|
|                                                                                     | Atom       | Mulliken | Electrostatic | Natural |
| 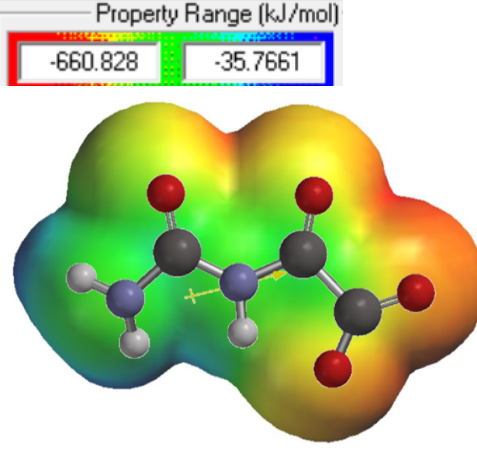 | O1         | -0.678   | -0.721        | -0.806  |
|                                                                                     | O2         | -0.774   | -0.779        | -0.897  |
|                                                                                     | O3         | -0.554   | -0.588        | -0.661  |
|                                                                                     | O4         | -0.611   | -0.640        | -0.739  |
|                                                                                     | N1         | -0.810   | -0.687        | -0.828  |
|                                                                                     | N2         | -0.765   | -1.007        | -0.957  |
|                                                                                     | C1         | 0.716    | 0.698         | 0.881   |
|                                                                                     | C2         | 0.599    | 0.592         | 0.728   |
|                                                                                     | C3         | 0.951    | 0.974         | 1.004   |
|                                                                                     | H2 (N2)    | 0.292    | 0.385         | 0.409   |
|                                                                                     | H3 (N2)    | 0.288    | 0.389         | 0.401   |
|                                                                                     | H4 (N1)    | 0.347    | 0.353         | 0.464   |

**Table S6.** Atom numbering (left), and atoms electrostatic charge (right) of di-OXL anion.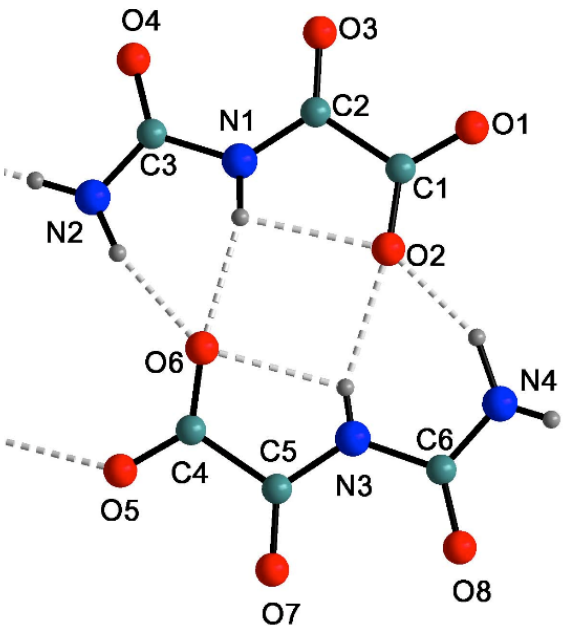

| Atom       | Charge (e) |               |         |
|------------|------------|---------------|---------|
|            | Mulliken   | Electrostatic | Natural |
| O1         | -0.683     | -0.737        | -0.810  |
| O2         | -0.782     | -0.833        | -0.920  |
| O3         | -0.578     | -0.586        | -0.683  |
| O4         | -0.654     | -0.694        | -0.779  |
| O5         | -0.683     | -0.737        | -0.810  |
| O6         | -0.782     | -0.832        | -0.920  |
| O7         | -0.578     | -0.586        | -0.683  |
| O8         | -0.654     | -0.693        | -0.779  |
| N1         | -0.826     | -0.668        | -0.817  |
| N2         | -0.805     | -1.095        | -0.968  |
| N3         | -0.826     | -0.668        | -0.817  |
| N4         | -0.805     | -1.094        | -0.968  |
| C1         | 0.717      | 0.733         | 0.892   |
| C2         | 0.617      | 0.596         | 0.732   |
| C3         | 0.948      | 1.004         | 1.002   |
| C4         | 0.717      | 0.733         | 0.895   |
| C5         | 0.617      | 0.596         | 0.732   |
| C6         | 0.948      | 1.003         | 1.002   |
| H1 (N2)    | 0.272      | 0.393         | 0.397   |
| H2 (N4)    | 0.272      | 0.392         | 0.397   |
| H3 (N4-O2) | 0.383      | 0.507         | 0.469   |
| H4 (N3)    | 0.391      | 0.378         | 0.480   |
| H5 (N2)    | 0.383      | 0.507         | 0.469   |
| H6 (N1)    | 0.391      | 0.378         | 0.480   |

## References.

- 1 J. March, in *Advanced Organic Chemistry (reactions, mechanism and structure)*; **1992**, Fourth Edition; John Walley & Sons, Page 383. ISBN-10: 0471581488
